# Supplementary material for: The Growth of Extended Melem Units on g-C3N4 by Hydrothermal Treatment and Its Effect on Photocatalytic Activity of g-C3N4 for Photodegradation of Tetracycline Hydrochloride under Visible Light Irradiation
Source: MDPI journal article supplement (doi:10.3390/nano12172945), 2022-08-26
Supplement: s1 [file s1]

Supplementary Materials

# The Growth of Extended Melem Units on g-C<sub>3</sub>N<sub>4</sub> by Hydrothermal Treatment and Its Effect on Photocatalytic Activity of g-C<sub>3</sub>N<sub>4</sub> for Photodegradation of Tetracycline Hydrochloride under Visible Light Irradiation

Thi Van Anh Hoang, Phuong Anh Nguyen, Won Mook Choi and Eun Woo Shin \*

School of Chemical Engineering, University of Ulsan, Daehakro 93, Nam-gu, Ulsan 44610, Korea

\* Correspondence: ewshin@ulsan.ac.kr; Tel.: +82-52-259-2253

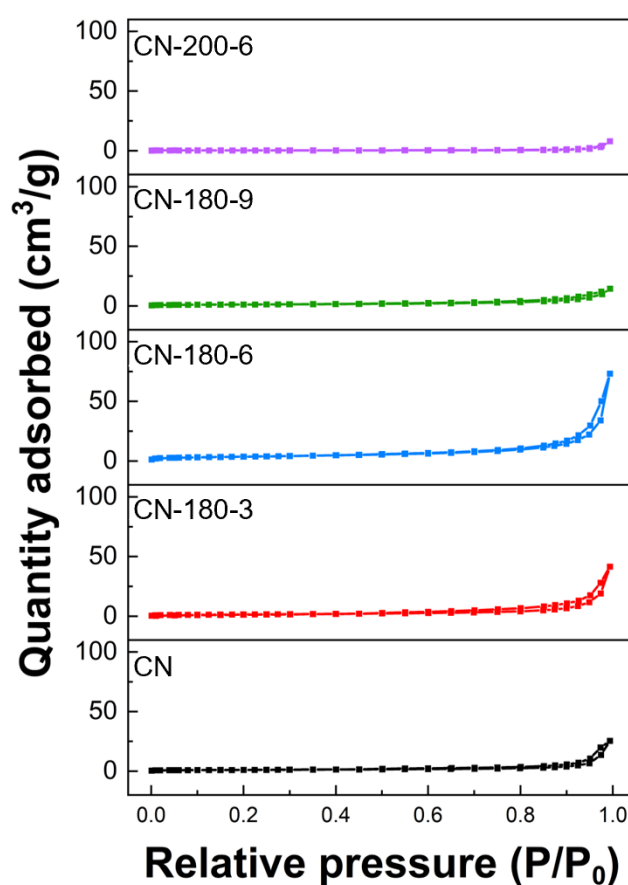

Figure S1. N<sub>2</sub> adsorption/desorption isotherms of as-prepared photocatalysts.

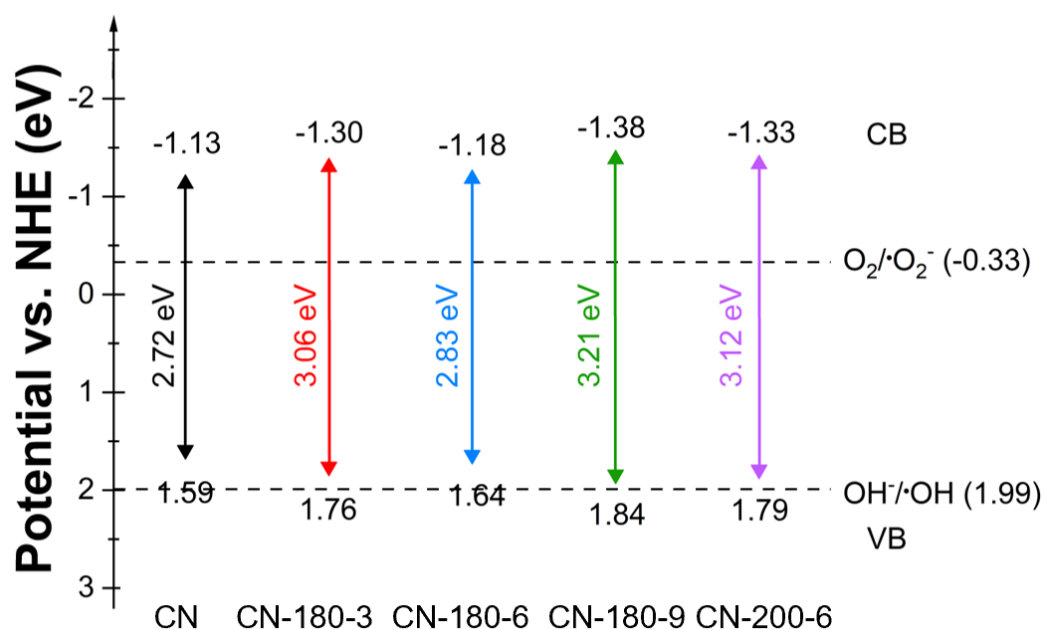

Figure S2. Band diagrams of the CN-180-x and CN-200-6 photocatalysts.

Table S1. O-groups data from XPS.

|      | CN-180-3 | CN-180-6 | CN-180-9 | CN-200-6 |
|------|----------|----------|----------|----------|
| COOH | 25.10    | 47.30    | 51.86    | 46.24    |
| C=O  | 24.02    | 40.95    | 39.48    | 24.56    |
| OH   | 50.87    | 11.75    | 8.66     | 19.20    |

Table S2. Kinetic rate constants (k) and correlation coefficients ( $r^2$ ) of TC photodegradation.

| Sample   | $k \times 10^3 \text{ (min}^{-1}\text{)}$ | $r^2$   |
|----------|-------------------------------------------|---------|
| CN       | 6.6                                       | 0.98247 |
| CN-180-3 | 11.8                                      | 0.99719 |
| CN-180-6 | 23.6                                      | 0.98859 |
| CN-180-9 | 5.8                                       | 0.99199 |
| CN-200-6 | 2.3                                       | 0.99224 |
